# Supplementary material for: Characterization of DNA methylation in Malawian Mycobacterium tuberculosis clinical isolates
Source: PubMed Central journal article supplement (PMC7749660; doi:10.7717/peerj.10432), 2020-12-16
Supplement: peerj-08-10432-s001.pdf [file peerj-08-10432-s001.pdf]

**Supporting Table 1: Methylation efficiency for 34 Mycobacterium tuberculosis samples**

| Sample         | Lineage | CACGCAG 820) | CTCCAG (1947) | CTGGAG (1947) | GATNNNNRTAC (363) | GTAYNNNNATC (363) |
|----------------|---------|--------------|---------------|---------------|-------------------|-------------------|
| ERS2711939     | L4      | 0.96585363   | 0.972265      | 0.94966614    | 0                 | 0                 |
| ERS2711940     | L4      | 0.9792683    | 0.97842836    | 0.9686698     | 0                 | 0                 |
| ERS2711941     | L4      | 0.96707314   | 0             | 0.58294815    | 0                 | 0                 |
| ERS2711942     | L4      | 0.9768293    | 0.98151004    | 0.96712893    | 0                 | 0                 |
| ERS2711943     | L1      | 0.5609756    | 0.9866461     | 0.972265      | 0.93663913        | 0.93112946        |
| ERS2711944     | L4      | 0.96585363   | 0.9712378     | 0.94453007    | 0                 | 0                 |
| ERS2711945     | L4      | 0.7390244    | 0.7786338     | 0.68875194    | 0                 | 0                 |
| ERS2711946     | L4      | 0.96829265   | 0.97740114    | 0.95428866    | 0                 | 0                 |
| ERS2711947     | L4      | 0.97195125   | 0.9712378     | 0.9481253     | 0                 | 0                 |
| ERS2711948     | L1      | 0            | 0.5100154     | 0.43348742    | 0                 | 0.3168044         |
| ERS2711949     | L4      | 0.95731705   | 0.9583975     | 0.9244992     | 0                 | 0                 |
| ERS2711950     | L4      | 0.97195125   | 0.9820236     | 0.9583975     | 0                 | 0                 |
| ERS2711951     | L4      | 0.9646341    | 0.9794556     | 0.95017976    | 0.90082645        | 0.8953168         |
| ERS2711952     | L4      | 0.9487805    | 0.96302       | 0.9342578     | 0                 | 0                 |
| ERS2711953     | L2      | 0.65         | 0             | 0             | 0.4903581         | 0.47933885        |
| ERS2711954     | L2      | 0.95609754   | 0             | 0             | 0.8787879         | 0.8595041         |
| ERS2711955     | L2      | 0.9634146    | 0             | 0             | 0.8787879         | 0.8815427         |
| ERS2711956     | L1      | 0            | 0.33538777    | 0.26759118    | 0                 | 0                 |
| SAMEA104606019 | L1      | 0.7963415    | 0.990755      | 0.99126863    | 0.969697          | 0.9641873         |
| SAMEA104606020 | L1      | 0.7134146    | 0.9902414     | 0.9892142     | 0.96694213        | 0.9614325         |
| SAMEA104606021 | L1      | 0.7487805    | 0.98767334    | 0.9871597     | 0.9641873         | 0.9586777         |
| SAMEA104606022 | L5      | 0.997561     | 0.97842836    | 0.972265      | 0.9889807         | 0.9889807         |
| SAMEA104606023 | L2      | 0.9902439    | 0             | 0             | 0.95592284        | 0.9614325         |
| SAMEA104606024 | L4      | 0.99512196   | 0.98870057    | 0.9851053     | 0                 | 0                 |
| SAMEA104606025 | L4      | 0.99268293   | 0.96302       | 0.96764255    | 0.94490355        | 0.95316803        |
| SAMEA104606026 | L6      | 0.9902439    | 0.978942      | 0.97791475    | 0.9476584         | 0.95592284        |
| SAMEA104606027 | L6      | 0.9890244    | 0             | 0             | 0.862259          | 0.8705234         |
| SAMEA104606028 | L2      | 0.9902439    | 0             | 0             | 0.92837465        | 0.93112946        |

**Supporting Table 1: Methylation efficiency for 34 Mycobacterium tuberculosis samples**

|                |    |            |            |            |            |            |
|----------------|----|------------|------------|------------|------------|------------|
| SAMEA104606029 | L4 | 0.99512196 | 0.9892142  | 0.9861325  | 0          | 0          |
| SAMEA104606030 | L5 | 0.9890244  | 0.9650745  | 0.9619928  | 0.9834711  | 0.9807162  |
| SAMEA104606031 | L6 | 0.9890244  | 0.9820236  | 0.98099643 | 0.9614325  | 0.95592284 |
| SAMEA104606032 | L6 | 0.9890244  | 0.972265   | 0.97072417 | 0.94490355 | 0.9476584  |
| SAMEA104606033 | L6 | 0.99268293 | 0.9763739  | 0.9753467  | 0.95592284 | 0.9586777  |
| SAMEA104606034 | L6 | 0.9902439  | 0.96815616 | 0.9661017  | 0.9476584  | 0.94490355 |

---
